# Supplementary material
Source: PubMed Central journal article supplement (PMC4153842)
Supplement: 14_097_Govind.Suppl.pdf [file 14_097_Govind.Suppl.pdf]

Supplemental Data

ImmunoChip Identifies Novel, and Replicates Known, Genetic Risk Loci for Rheumatoid Arthritis in Black South Africans

Nimmisha Govind,<sup>1</sup> Ananyo Choudhury,<sup>2</sup> Bridget Hodgkinson,<sup>1</sup> Claudia Ickinger,<sup>1</sup> Jacqueline Frost,<sup>3</sup> Annette Lee,<sup>4</sup> Peter K Gregersen,<sup>4</sup> Richard J Reynolds,<sup>5</sup> S Louis Bridges Jr,<sup>5</sup> Scott Hazelhurst,<sup>2,6</sup> Michèle Ramsay,<sup>2,3</sup> and Mohammed Tikly<sup>1,2</sup>

Online address: <http://www.molmed.org>

The Feinstein Institute for Medical Research **North Shore LIJ**  
Empowering Imagination. Pioneering Discovery.®

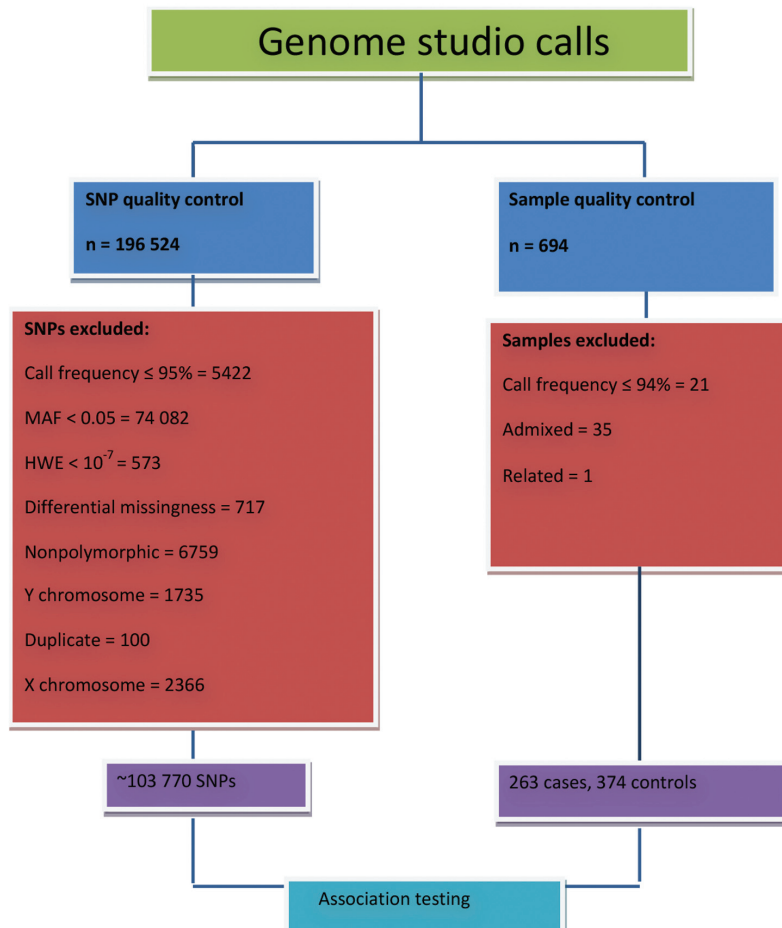

Supplementary Figure S1. Flow diagram of quality control summarizing the SNPs and samples that survived the QC procedures.

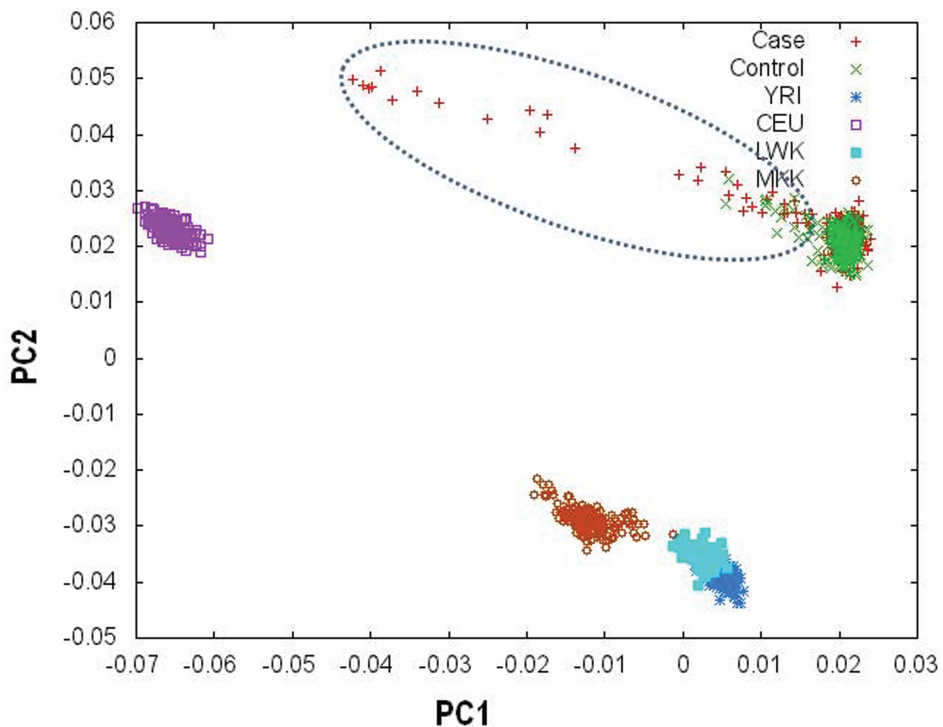

**Supplementary Figure S2.** Principle component (PC) analyses plot showing the structure of black South African RA cases and controls in relation to CEU, YRI, LWK, MKK populations. The individuals with significant European admixture are circled. A total of 13 355 SNPs were used for the analysis.

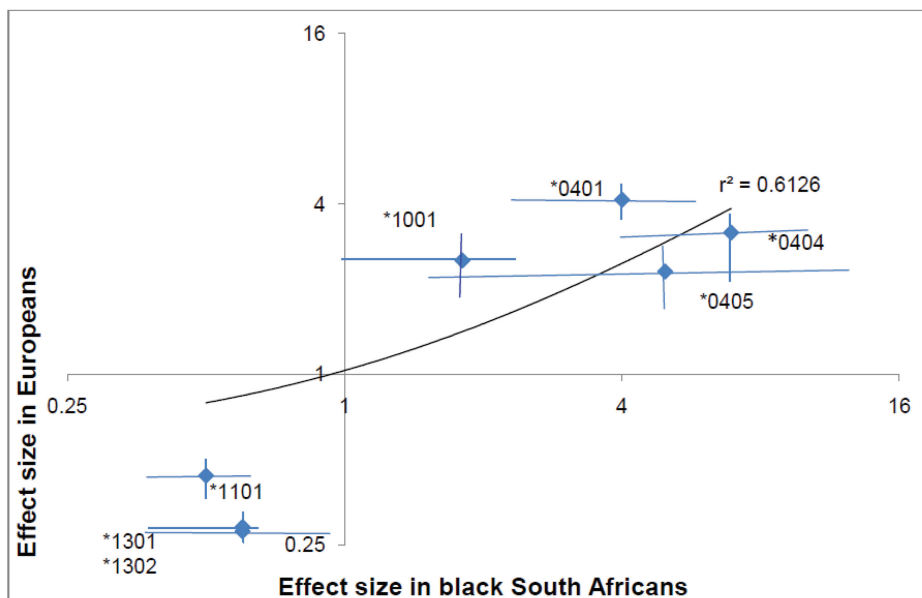

**Supplementary Figure S3.** Comparison of classical *HLA-DRB1* allele effect sizes in Europeans and black South Africans. The odds ratios (OR) (and 95% confidence intervals) of only the significantly associated classical *HLA-DRB1* alleles in our study are plotted as a function of the reported odds ratios (and 95% confidence intervals) in Europeans (see van der Woude D, *et al.* (2010) Protection Against Anti-Citrullinated Protein Antibody-Positive Rheumatoid Arthritis Is Predominantly Associated With *HLA-DRB1*\*1301: A Meta-Analysis of *HLA-DRB1* Associations With Anti-Citrullinated Protein Antibody-Positive and Anti-Citrullinated Protein Antibody-Negative Rheumatoid Arthritis in Four European Populations. *Arthritis Rheum.* 62:1236–45).



A STUDY OF GENETIC VARIANTS ASSOCIATED WITH RA IN AN AFRICAN POPULATION

Supplementary Table S1. Significantly associated SNPs.

| Gene                      | Number of significantly associated SNPs | Range of P values   |                     | Range of OR (95% CI) | Region     |
|---------------------------|-----------------------------------------|---------------------|---------------------|----------------------|------------|
|                           |                                         | Before*             | After*              |                      |            |
| <i>HLA-DQB1   DQA2</i>    | 39                                      | 2.33E-18 - 8.35E-8  | <b>0.79 - 0.04</b>  | 3.90 - 0.49          | Intergenic |
| <i>HLA-DRB1   DQA1</i>    | 14                                      | 4.08E-22 - 3.29E-8  | <b>0.98 - 0.06</b>  | 4.18 - 0.47          | Intergenic |
| <i>HLA-DRA   DRB5</i>     | 10                                      | 1.49E-20 - 1.49E-20 | <b>0.38 - 0.007</b> | 3.11 - 0.53          | Intergenic |
| <i>HLA-DRA</i>            | 3                                       | 8.27E-9 - 1.18E-9   | <b>0.94 - 0.17</b>  | 2.21 - 1.77          | Intron     |
| <i>BTNL2   HLA DRA</i>    | 7                                       | 4.55E-09 - 2.30E-9  | <b>0.75 - 0.89</b>  | 0.52 - 0.50          | Intergenic |
| <i>CCHCR1</i>             | 1                                       | 8.69E-8             | <b>0.03</b>         | 1.80                 | Coding     |
| <i>HLA-DRB5</i>           | 1                                       | 1.31E-25            | <b>0.21</b>         | 6.15                 | Intron     |
| <i>LOC442175   ZNF165</i> | 1                                       | 1.64E-8             | <b>0.19</b>         | 2.23                 | Intergenic |
| <i>PSMB9   HLA-DMB</i>    | 1                                       | 7.98E-10            | <b>0.32</b>         | 7.79                 | Intergenic |

OR=odds ratio, CI= confidence interval, \*Before and after conditioning on the HLA DRB1 alleles

Supplementary Table S2. SNPs that reached  $p < 5 \times 10^{-4}$ .

| Chr | SNP        | A1 | MAF in cases | MAF in controls | A2 | P value  | OR (95% CI)      | Gene                        | Region     |
|-----|------------|----|--------------|-----------------|----|----------|------------------|-----------------------------|------------|
| 1   | rs6588249  | A  | 0.15         | 0.22            | G  | 0.00075  | 0.60 (0.45-0.81) | <i>IL23R</i>                | Intron     |
| 2   | rs36049530 | G  | 0.27         | 0.37            | A  | 0.000766 | 0.66 (0.51-0.84) | <i>IL18RAP   SLC9A4</i>     | Intergenic |
| 2   | rs3917267  | A  | 0.13         | 0.08            | G  | 0.001066 | 1.82 (1.27-2.63) | <i>IL1R1</i>                | Intron     |
| 2   | rs871658   | G  | 0.38         | 0.47            | C  | 0.000461 | 0.67 (0.53-0.84) | <i>IL1R1</i>                | Intron     |
| 2   | rs13035227 | G  | 0.37         | 0.48            | A  | 0.000261 | 0.66 (0.52-0.82) | <i>LOC100131131   IL1R1</i> | Intergenic |
| 2   | rs6754776  | G  | 0.37         | 0.48            | C  | 0.000261 | 0.65 (0.52-0.82) | <i>LOC100131131   IL1R1</i> | Intergenic |
| 2   | rs13012334 | G  | 0.22         | 0.32            | A  | 0.000484 | 0.63 (0.48-0.81) | <i>IL1R2   LOC100131131</i> | Intergenic |
| 2   | rs62182630 | A  | 0.19         | 0.27            | G  | 0.000623 | 0.62 (0.45-0.80) | <i>CTLA4   ICOS</i>         | Intergenic |
| 2   | rs13421616 | A  | 0.09         | 0.15            | G  | 0.000725 | 0.54 (0.48-0.68) | <i>CTLA4   ICOS</i>         | Intergenic |
| 4   | rs6825116  | A  | 0.45         | 0.35            | C  | 0.000157 | 1.55 (1.23-1.95) | <i>LOC389203   RBPJ</i>     | Intergenic |
| 4   | rs34185821 | G  | 0.48         | 0.37            | A  | 0.000158 | 1.55 (1.23-1.95) | <i>LOC389203   RBPJ</i>     | Intergenic |
| 4   | rs10517086 | A  | 0.48         | 0.38            | G  | 0.000172 | 1.54 (1.23-1.94) | <i>LOC389203   RBPJ</i>     | Intergenic |
| 4   | rs6448432  | A  | 0.52         | 0.41            | G  | 0.000176 | 1.54 (1.23-1.94) | <i>LOC389203   RBPJ</i>     | Intergenic |
| 4   | rs7668577  | C  | 0.53         | 0.42            | A  | 0.000194 | 1.53 (1.22-1.92) | <i>LOC389203   RBPJ</i>     | Intergenic |
| 4   | rs35944082 | G  | 0.46         | 0.36            | A  | 0.000223 | 1.54 (1.22-1.93) | <i>LOC389203   RBPJ</i>     | Intergenic |
| 4   | rs17630466 | G  | 0.467        | 0.37            | A  | 0.000342 | 1.51 (1.22-1.68) | <i>LOC389203   RBPJ</i>     | Intergenic |
| 4   | rs6822921  | A  | 0.42         | 0.52            | G  | 0.000512 | 0.67 (0.52-0.88) | <i>LOC389203   RBPJ</i>     | Intergenic |
| 6   | rs62434218 | A  | 0.51         | 0.42            | G  | 0.000866 | 1.46 (1.28-1.58) | <i>TNFAIP3   PERP</i>       | Intergenic |
| 6   | rs73778221 | A  | 0.09         | 0.15            | G  | 0.001034 | 0.55 (0.38-0.79) | <i>TNFAIP3   PERP</i>       | Intergenic |
| 6   | rs73796835 | A  | 0.24         | 0.17            | G  | 0.000995 | 1.59 (1.44-1.69) | <i>RSPH3   TAGAP</i>        | Intergenic |

MAF=Minor allele frequency, OR=Odds Ratio
